# Supplementary material for: Enhanced urea oxidation catalysis through Ni single-atom doping on Cu2O surfaces: a computational study
Source: Royal Society of Chemistry journal article supplement (doi:10.1039/d4ta02693d), 2024-01-01
Supplement: d4ta02693d1.pdf [file d4ta02693d1.pdf]

# Supporting Information for “Enhanced Urea Oxidation Catalysis through Ni Single-Atom Doping on Cu<sub>2</sub>O Surfaces: A Computational Study”

Xiaoqing Li,<sup>a</sup> Haiping Lin,<sup>b</sup> Wenjing Huang,<sup>a,\*</sup> Shiyun Xiong,<sup>a,\*</sup> Shaoming Huang<sup>a,\*</sup>

<sup>a</sup> School of Materials and Energy, Guangdong University of Technology, Guangzhou 510006, Guangdong, China. E-mail: [wjhuang42@gdut.edu.cn](mailto:wjhuang42@gdut.edu.cn); [syxiong@gdut.edu.cn](mailto:syxiong@gdut.edu.cn); [smhuang@gdut.edu.cn](mailto:smhuang@gdut.edu.cn).

<sup>b</sup> School of Physics and Information Technology, Shaanxi Normal University, Xian 710119, Shaanxi, China.

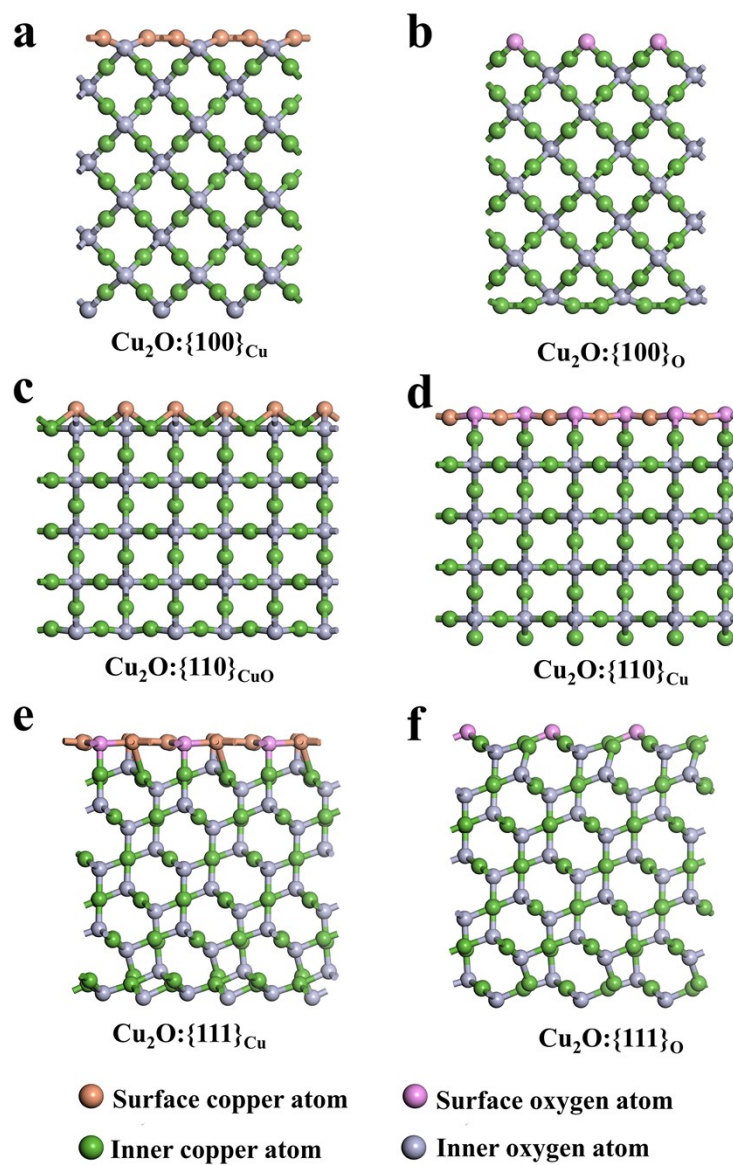

**Fig. S1** Side view of the six low-index surfaces of  $\text{Cu}_2\text{O}$  after relaxation. In the  $\text{Cu}_2\text{O}:\{111\}_{\text{Cu}}$  structure, the surface Cu atoms are relaxed to the same atomic plane as the subsurface O atoms.

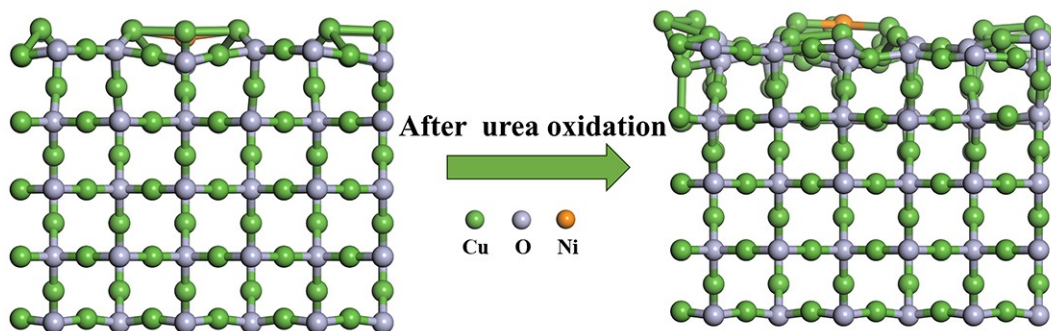

Fig. S2 Surface reconstruction of  $\text{Ni-Cu}_2\text{O}:\{110\}_{\text{Cu}}$  during urea adsorption process. Left: before urea adsorption; Right: after urea adsorption.

$\text{Ni-Cu}_2\text{O}:\{110\}_{\text{Cu}}$

0 eV/Å

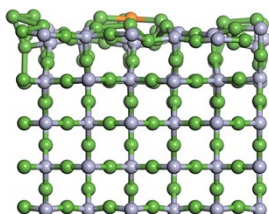

0.03 eV/Å

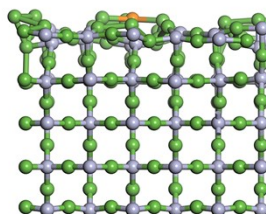

0.3 eV/Å

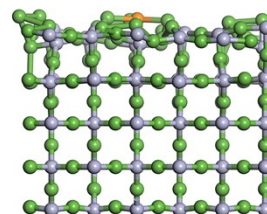

$\text{Ni-Cu}_2\text{O}:\{111\}_{\text{O}}$

0 eV/Å

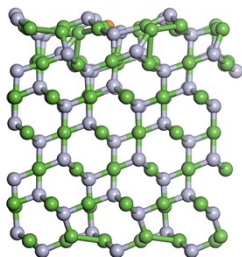

0.03 eV/Å

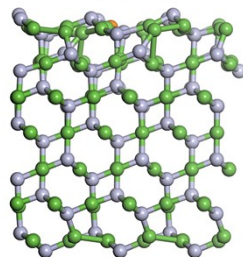

0.3 eV/Å

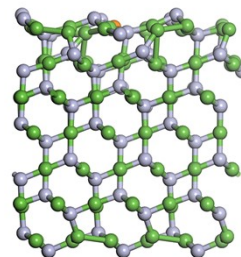

Fig. S3 The optimized structures for  $\text{Ni-Cu}_2\text{O}:\{110\}_{\text{Cu}}$  and  $\text{Ni-Cu}_2\text{O}:\{111\}_{\text{O}}$  under different electric fields.

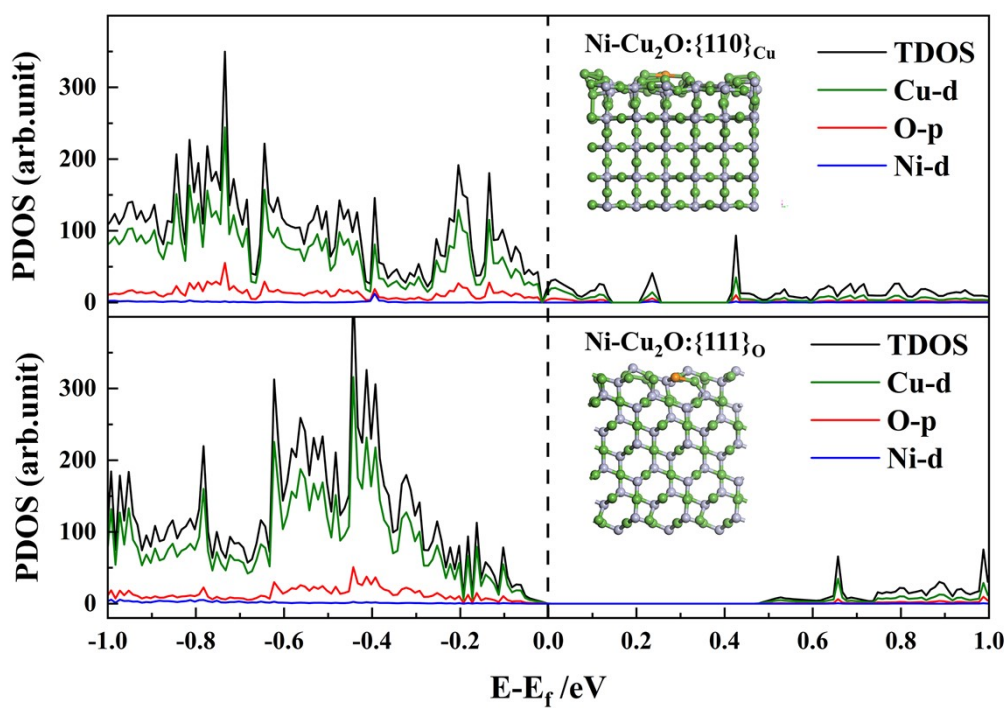

Fig. S4 TDOS and PDOS of Cu-d, Ni-d, and O-p orbitals in  $\text{Ni-Cu}_2\text{O}:\{110\}_{\text{Cu}}$  (top) and  $\text{Ni-Cu}_2\text{O}:\{111\}_{\text{O}}$  (bottom). Orange, green, and silver colors denote Ni, Cu, and O atoms, respectively.

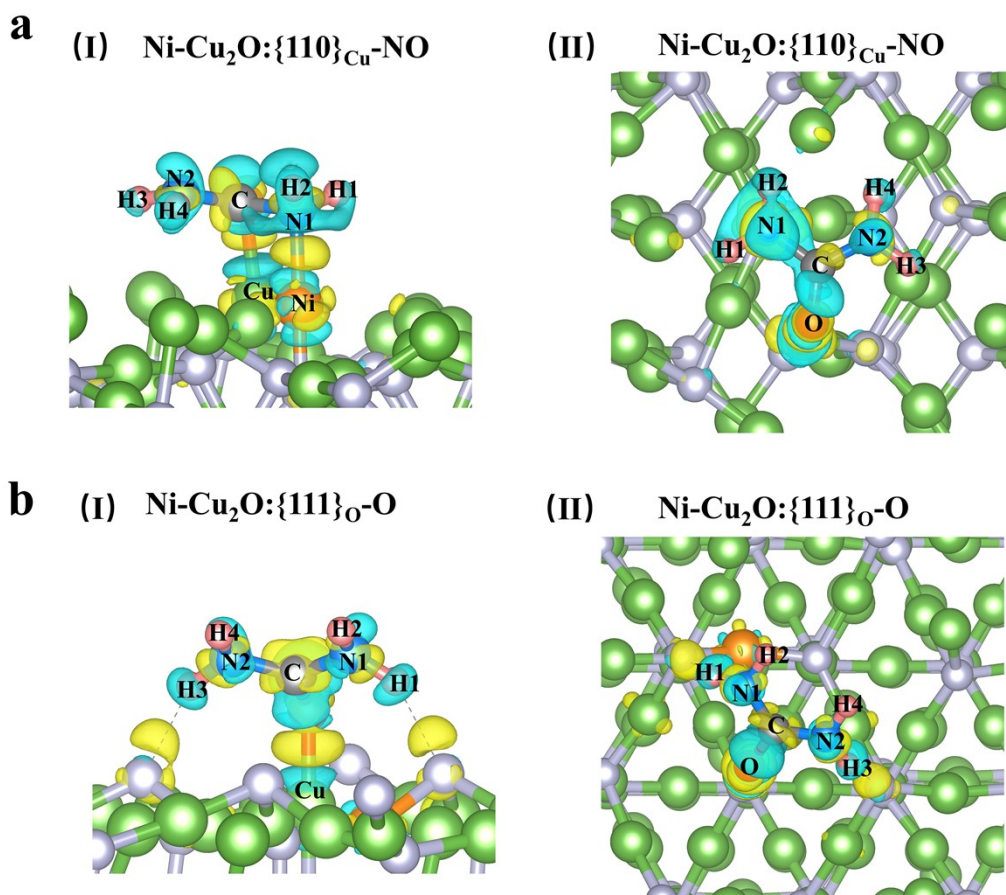

**Fig. S5** Differential charge density maps for  $\text{Ni-Cu}_2\text{O}:\{110\}_{\text{Cu}}\text{-NO}$  (a) and  $\text{Ni-Cu}_2\text{O}:\{111\}_{\text{O}}\text{-O}$  (b). The side and top views are illustrated in (I) and (II) of the corresponding subfigure. In all plots, the isosurface is set to  $0.003 \text{ e}\text{\AA}^{-3}$ .

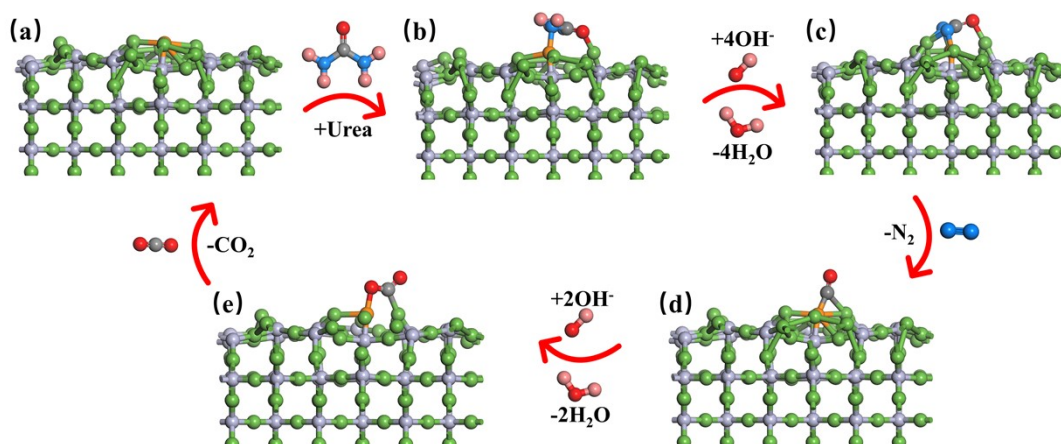

**Fig. S6** Schematic diagram of the reaction path flow for the oxidation of urea to  $\text{N}_2$  and  $\text{CO}_2$ .



**a Ni-Cu<sub>2</sub>O:{110}<sub>Cu</sub>**

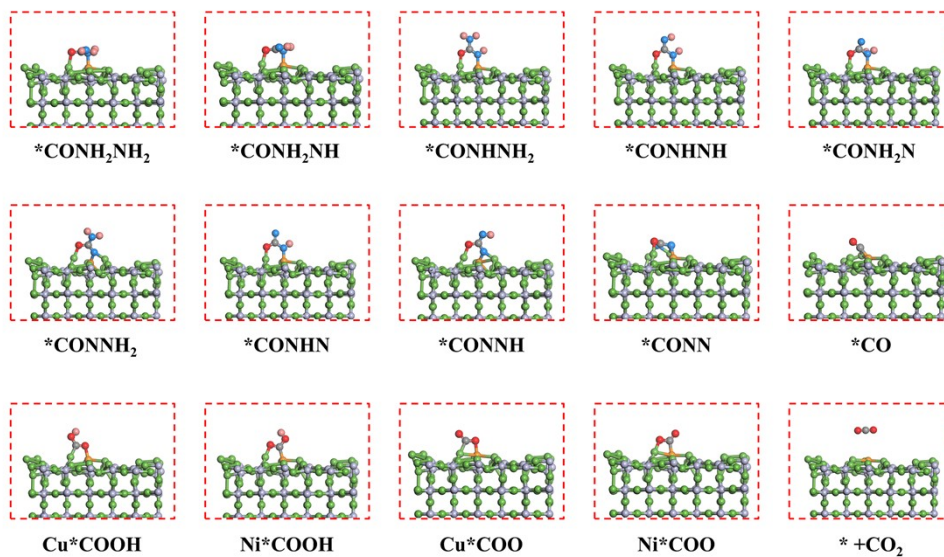

**b Ni-Cu<sub>2</sub>O:{111}<sub>O</sub>**

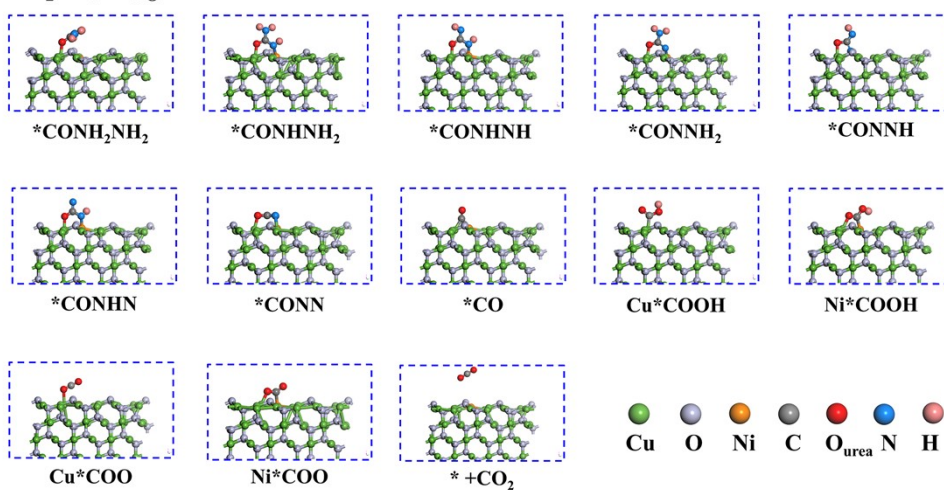

**Fig. S7** Optimized atomic structures of various intermediates during UOR reaction for (a) Ni-Cu<sub>2</sub>O:{110}<sub>Cu</sub>-NO and (b) Ni-Cu<sub>2</sub>O:{111}<sub>O</sub>-O.

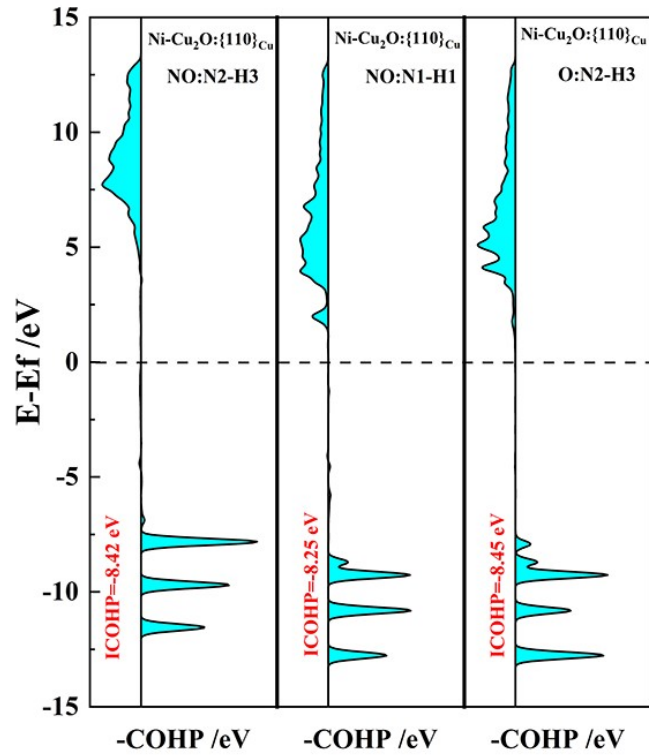

Fig. S8 Variation of -COHP with energy for the N-H bonds in Ni-Cu<sub>2</sub>O:{110}<sub>Cu</sub>-NO and Ni-Cu<sub>2</sub>O:{111}<sub>O</sub>-O.

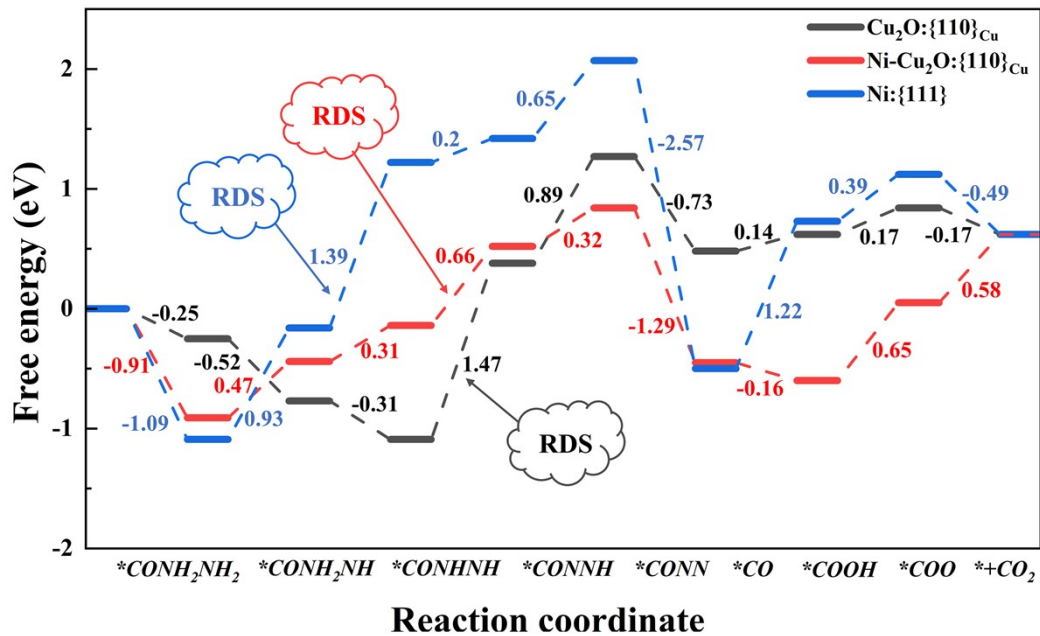

Fig. S9 Gibbs free energies of each intermediate during UOR on Ni:{111}, Cu<sub>2</sub>O:{110}<sub>Cu</sub>, and Ni-Cu<sub>2</sub>O:{110}<sub>Cu</sub>.

**a**  $\text{Cu}_2\text{O}:\{110\}_{\text{Cu}}$

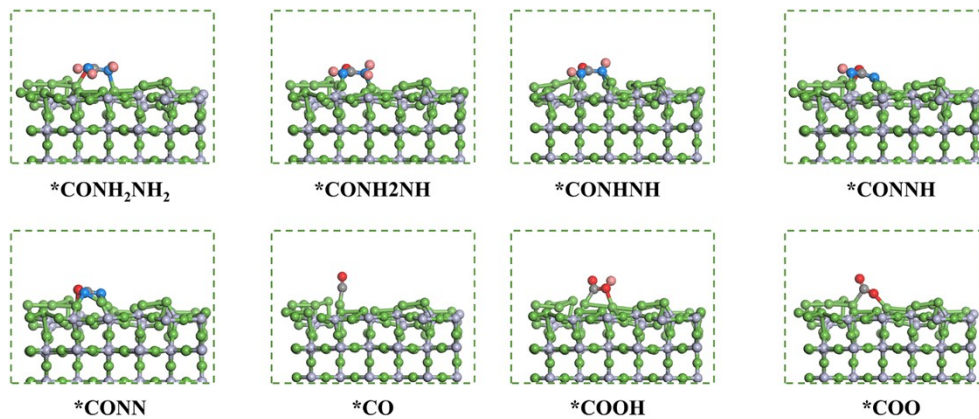

**b**  $\text{Ni}:\{111\}$

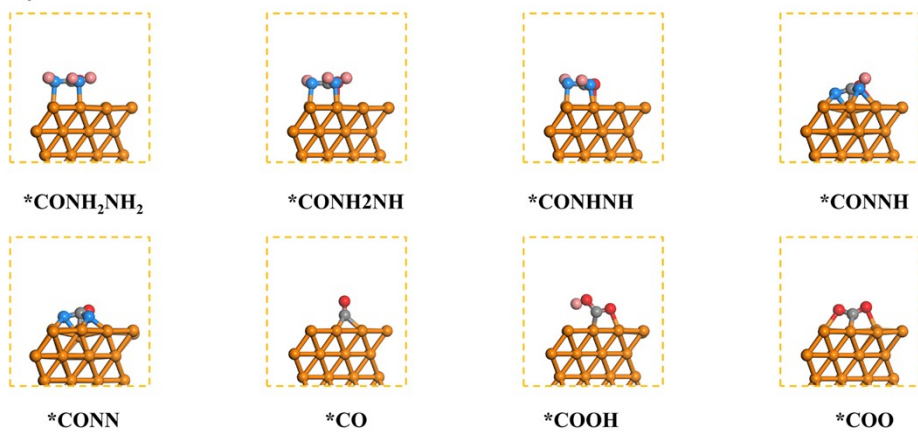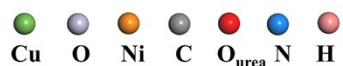

**Fig. S10** Optimized atomic structures of various intermediates during UOR reaction for (a)  $\text{Cu}_2\text{O}:\{110\}_{\text{Cu}}$  and (b)  $\text{Ni}:\{111\}$ .



**Table S1. Gibbs free energies, zero-point energies, and entropies of the reaction intermediates in Ni-Cu<sub>2</sub>O:{111}<sub>O</sub> and Ni-Cu<sub>2</sub>O:{110}<sub>Cu</sub> catalysts.**

| Species                            | ZPE (eV)                                 |                                          | TS (eV)                                 |                                         |
|------------------------------------|------------------------------------------|------------------------------------------|-----------------------------------------|-----------------------------------------|
|                                    | Ni-Cu <sub>2</sub> O:{110} <sub>Cu</sub> | Ni-Cu <sub>2</sub> O:{110} <sub>Cu</sub> | Ni-Cu <sub>2</sub> O:{111} <sub>O</sub> | Ni-Cu <sub>2</sub> O:{111} <sub>O</sub> |
| *CONH <sub>2</sub> NH <sub>2</sub> | 1.75                                     | 0.28                                     | 1.74                                    | 0.31                                    |
| *CONH <sub>2</sub> NH              | 1.42                                     | 0.25                                     | \                                       | \                                       |
| *CONH <sub>2</sub> NH <sub>2</sub> | 1.43                                     | 0.25                                     | 1.14                                    | 0.26                                    |
| *CONH <sub>2</sub> NH              | 1.06                                     | 0.25                                     | 1.06                                    | 0.25                                    |
| *CONH <sub>2</sub> N               | 1.06                                     | 0.26                                     | \                                       | \                                       |
| *CONNH <sub>2</sub>                | 1.10                                     | 0.23                                     | 1.09                                    | 0.23                                    |
| *CONHN                             | 0.74                                     | 0.23                                     | 0.72                                    | 0.24                                    |
| *CONNH                             | 0.75                                     | 0.21                                     | 0.72                                    | 0.24                                    |
| *CONN                              | 0.46                                     | 0.13                                     | 0.44                                    | 0.17                                    |
| *CO                                | 0.20                                     | 0.10                                     | 0.2                                     | 0.15                                    |
| Cu*COOH                            | 0.64                                     | 0.17                                     | 0.61                                    | 0.22                                    |
| Ni*COOH                            | 0.64                                     | 0.18                                     | 0.56                                    | 0.18                                    |
| Cu*COO                             | 0.31                                     | 0.18                                     | 0.32                                    | 0.19                                    |
| Ni*COO                             | 0.31                                     | 0.16                                     | 0.32                                    | 0.19                                    |

**Table S2. The d-band center  $\epsilon_d$  of the active sites before and after urea molecules adsorption.** For urea molecules adsorbed by dual active sites, we adopt the method in Ref [1].

| Catalyst                                 | $\epsilon_d$ (eV) before adsorption | $\epsilon_d$ (eV) after adsorption |
|------------------------------------------|-------------------------------------|------------------------------------|
| Ni-Cu <sub>2</sub> O:{110} <sub>Cu</sub> | -1.47                               | -1.77                              |
| Ni-Cu <sub>2</sub> O:{111} <sub>O</sub>  | -1.21                               | -1.02                              |

**Table S3. Comparison of urea adsorption energy, overpotential, and CO<sub>2</sub> desorption energy in various UOR electrocatalysts reported in literatures.** The UOR mechanisms in literatures include both conventional adsorption mechanisms and lattice oxygen mechanisms (LOM). The  $\Delta G_{\max}$  of dehydrogenation represents the maximum dehydrogenation reaction energy.

| Catalyst                                     | $\Delta G_{\max}$ of dehydrogenation (eV) | CO <sub>2</sub> desorption energy (eV) | Overpotential (V) | Ref.             |
|----------------------------------------------|-------------------------------------------|----------------------------------------|-------------------|------------------|
| <b>Ni-Cu<sub>2</sub>O:{110}<sub>Cu</sub></b> | <b>0.66</b>                               | <b>0.58</b>                            | <b>0.29</b>       | <b>This work</b> |
| NiOOH                                        | 1.44                                      | 0.9                                    | 1.07              | [2]              |
| NiOO (LOM)                                   | 0.96                                      | 0.4                                    | 0.59              | [2]              |
| LNO-2                                        | 0.69                                      | 1.05                                   | 0.68              | [3]              |
| LNO-2 (LOM)                                  | 0.69                                      | 0.11                                   | 0.32              | [3]              |
| CoNi@CN-CoNiMoO                              | 1.15                                      | -0.32                                  | 0.78              | [4]              |
| O <sub>vac</sub> -V-Ni(OH) <sub>2</sub>      | 2.35                                      | 0.67                                   | 1.98              | [5]              |
| Ac-CoOCl-V                                   | 2.05                                      | -0.74                                  | 1.68              | [6]              |
| Ru-Co DAS/NiO                                | 1.63                                      | 0.56                                   | 1.26              | [7]              |

**Table S4. Calculated d-band centers for \*COO intermediate.** For Ni-Cu<sub>2</sub>O:{111}<sub>O</sub>-Cu\*COO, CO<sub>2</sub> is adsorbed solely by a Cu atom, while for other structures, CO<sub>2</sub> is adsorbed by multiple active sites.

| Species                                          | $\epsilon_d$ (eV) |
|--------------------------------------------------|-------------------|
| Ni-Cu <sub>2</sub> O:{110} <sub>Cu</sub> -Ni*COO | -1.41             |
| Ni-Cu <sub>2</sub> O:{110} <sub>Cu</sub> -Cu*COO | -1.82             |
| Ni-Cu <sub>2</sub> O:{111} <sub>O</sub> -Ni *COO | -1.53             |
| Ni-Cu <sub>2</sub> O:{111} <sub>O</sub> -Cu*COO  | -1.67             |

**Table S5. Gibbs free energies, zero-point energies, and entropies of the reaction intermediates for Ni:{111} and Cu<sub>2</sub>O:{110}<sub>Cu</sub> catalysts.**

| Species                            | ZPE (eV) | TS (eV)  | ZPE (eV)                              | TS (eV)                               |
|------------------------------------|----------|----------|---------------------------------------|---------------------------------------|
|                                    | Ni:{111} | Ni:{111} | Cu <sub>2</sub> O:{110} <sub>Cu</sub> | Cu <sub>2</sub> O:{110} <sub>Cu</sub> |
| *CONH <sub>2</sub> NH <sub>2</sub> | 1.71     | 0.2      | 1.73                                  | 0.30                                  |
| *CONH <sub>2</sub> NH              | 1.40     | 0.25     | 1.45                                  | 0.21                                  |
| *CONH <sub>2</sub> NH              | 1.07     | 0.20     | 1.16                                  | 0.25                                  |
| *CONNH                             | 0.72     | 0.17     | 0.78                                  | 0.16                                  |
| *CONN                              | 0.43     | 0.14     | 0.46                                  | 0.14                                  |
| *CO                                | 0.19     | 0.14     | 0.19                                  | 0.18                                  |
| *COOH                              | 0.59     | 0.16     | 0.59                                  | 0.16                                  |
| *COO                               | 0.28     | 0.18     | 0.29                                  | 0.23                                  |

## References:

- 1 S. Ponath, M. Menger, L. Grothues, M. Weber, D. Lentz, C. Strohmann and M. Christmann, *Angew. Chem. Int. Ed.*, 2023, **62**, e202216920.
- 2 L. Zhang, L. Wang, H. Lin, Y. Liu, J. Ye, Y. Wen, A. Chen, L. Wang, F. Ni, Z. Zhou, S. Sun, Y. Li, B. Zhang and H. Peng, *Angew. Chem. Int. Ed.*, 2019, **58**, 16820-16825.
- 3 W.-K. Han, J.-X. Wei, K. Xiao, T. Ouyang, X. Peng, S. Zhao and Z.-Q. Liu, *Angew. Chem. Int. Ed.*, 2022, **61**, e202206050.
- 4 G. Qian, J. Chen, W. Jiang, T. Yu, K. Tan and S. Yin, *Carbon Energy*, 2023, **5**, e368.
- 5 H. Qin, Y. Ye, J. Li, W. Jia, S. Zheng, X. Cao, G. Lin and L. Jiao, *Adv. Funct. Mater.*, 2023, **33**, 2209698.
- 6 B. Zhang, C. Pan, H. Liu, X. Wu, H. Jiang, L. Yang, Z. Qi, G. Li, L. Shan, Y. Lin, L. Song and Y. Jiang, *Chem. Eng. J.*, 2022, **439**, 135768.
- 7 X. Zheng, J. Yang, P. Li, Z. Jiang, P. Zhu, Q. Wang, J. Wu, E. Zhang, W. Sun, S. Dou, D. Wang and Y. Li, *Angew. Chem. Int. Ed.*, 2023, **62**, e202217449.
